# Supplementary material
Source: PubMed Central journal article supplement (PMC3904775)
Supplement: ci400289j_si_001.pdf [file ci400289j_si_001.pdf]

# Ligand and structure-based classification models for Prediction of P-glycoprotein inhibitors

*Freya Klepsch<sup>§,‡,†</sup>, Poongavanam Vasanthanathan<sup>§,†</sup>, Gerhard F Ecker<sup>§,\*</sup>*

<sup>§</sup>University of Vienna, Department of Medicinal Chemistry, Althanstraße 14, 1090 Vienna,  
Austria.

<sup>‡</sup>Current address: CeMM Research Center for Molecular Medicine of the Austrian Academy  
of Sciences, Lazarettgasse 14, 1090 Vienna, Austria

\* Email: [gerhard.f.ecker@univie.ac.at](mailto:gerhard.f.ecker@univie.ac.at)

<sup>†</sup> These authors contributed equally to this manuscript.

Supplementary material

- SI-Table 1: List of descriptors used for PCA.
- SI-Table 2: Results of training set prediction and 10 fold cross-validation.
- SI-Table 3: List of MACCS fingerprints that contributed to the P-gp Inhibitor models.
- SI-Table 4: List of substructure fingerprints that contributed to the P-gp Inhibitor models.
- SI-Table 4: Classification results of simple physicochemical models performed on the Dolghih et al. Dataset.
- SI-Figure 1: Distribution plots physicochemical properties.
- SI-Figure 2: Decision tree model.
- SI-Figure 3: Applicability domain experiment using ED approach for the training and test sets, as well as for the FDA approved drugs.

**SI-Table1:** List of physicochemical properties used for PCA

| Properties       | Description                                                                                     | Properties      | Description                         |
|------------------|-------------------------------------------------------------------------------------------------|-----------------|-------------------------------------|
| <b>logP(o/w)</b> | Log of the partition coefficient (octanol/water)                                                | <b>a_count</b>  | Number of atoms                     |
| <b>SMR</b>       | Molar refractivity (including implicit hydrogens)                                               | <b>a_heavy</b>  | Number of heavy atoms               |
| <b>TPSA</b>      | Total polar surface area                                                                        | <b>a_hyd</b>    | Number of hydrophobic atoms         |
| <b>weight</b>    | Molecular weight                                                                                | <b>a_nC</b>     | Number of carbon atoms              |
| <b>apol</b>      | Sum of the atomic polarizabilities                                                              | <b>a_nH</b>     | Number of hydrogen atoms            |
| <b>bpol</b>      | Sum of the absolute value of the difference between atomic polarizabilities of all bonded atoms | <b>a_nO</b>     | Number of oxygen atoms              |
| <b>density</b>   | Density                                                                                         | <b>b_ar</b>     | Number of aromatic bonds            |
| <b>logs</b>      | Log of the solubility in water                                                                  | <b>b_count</b>  | Number of bonds                     |
| <b>MR</b>        | Molar refractivity                                                                              | <b>b_double</b> | Number of double bonds              |
| <b>pmi</b>       | Principal moment of inertia                                                                     | <b>b_heavy</b>  | Number of bonds between heavy atoms |
| <b>pmiX</b>      | x component of pmi                                                                              | <b>b_single</b> | Number of single bonds              |
| <b>pmiY</b>      | y component of pmi                                                                              | <b>diameter</b> | Diameter                            |
| <b>pmiZ</b>      | z component of pmi                                                                              | <b>lip_acc</b>  | Number of O and N atoms             |
| <b>vdw_area</b>  | Area of van der Waals surface                                                                   | <b>lip_don</b>  | Number of OH and NH atoms           |
| <b>vdw_vol</b>   | Van der Waals volume                                                                            | <b>radius</b>   | Radius                              |
| <b>vol</b>       | Volume                                                                                          |                 |                                     |

**SI-Table 2:** Results of training set prediction and 10 fold cross-validation

| Validation   | Descriptors | Models | TP  | TN  | FP  | FN  | Sensitivity | Specificity | Accuracy | G-Mean | MCC  |
|--------------|-------------|--------|-----|-----|-----|-----|-------------|-------------|----------|--------|------|
| Training Set | MOE         | RF     | 840 | 355 | 5   | 1   | 1.00        | 0.99        | 1.00     | 0.99   | 0.99 |
|              |             | SVM    | 787 | 204 | 156 | 54  | 0.94        | 0.57        | 0.83     | 0.73   | 0.56 |
|              |             | KNN    | 841 | 360 | 0   | 0   | 1.00        | 1.00        | 1.00     | 1.00   | 1.00 |
|              |             | B-QSAR | 751 | 270 | 90  | 90  | 0.89        | 0.75        | 0.85     | 0.82   | 0.64 |
|              | MACCS       | RF     | 799 | 241 | 119 | 42  | 0.95        | 0.67        | 0.87     | 0.80   | 0.67 |
|              |             | SVM    | 785 | 142 | 218 | 56  | 0.93        | 0.39        | 0.77     | 0.61   | 0.40 |
|              |             | KNN    | 809 | 231 | 129 | 32  | 0.96        | 0.64        | 0.87     | 0.79   | 0.67 |
|              |             | B-QSAR | 616 | 255 | 105 | 225 | 0.73        | 0.71        | 0.73     | 0.72   | 0.41 |
|              | SS-FP       | RF     | 812 | 164 | 196 | 29  | 0.97        | 0.46        | 0.81     | 0.66   | 0.53 |
|              |             | SVM    | 807 | 141 | 219 | 34  | 0.96        | 0.39        | 0.79     | 0.61   | 0.46 |
|              |             | KNN    | 816 | 160 | 200 | 25  | 0.97        | 0.44        | 0.81     | 0.66   | 0.53 |
|              |             | B-QSAR | 725 | 191 | 169 | 116 | 0.86        | 0.53        | 0.76     | 0.68   | 0.41 |
|              | Combined    | RF     | 841 | 356 | 4   | 0   | 1.00        | 0.99        | 1.00     | 0.99   | 0.99 |
|              |             | SVM    | 788 | 223 | 137 | 53  | 0.94        | 0.62        | 0.84     | 0.76   | 0.61 |
|              |             | KNN    | 841 | 360 | 0   | 0   | 1.00        | 1.00        | 1.00     | 1.00   | 1.00 |
|              |             | B-QSAR | 732 | 261 | 109 | 99  | 0.88        | 0.71        | 0.83     | 0.79   | 0.59 |

|                        |          |        |     |     |     |     |      |      |      |      |      |
|------------------------|----------|--------|-----|-----|-----|-----|------|------|------|------|------|
| Training<br>10 fold CV | MOE      | RF     | 780 | 245 | 115 | 61  | 0.93 | 0.68 | 0.85 | 0.79 | 0.64 |
|                        |          | SVM    | 788 | 199 | 161 | 53  | 0.94 | 0.55 | 0.82 | 0.72 | 0.55 |
|                        |          | KNN    | 746 | 258 | 102 | 95  | 0.89 | 0.72 | 0.84 | 0.80 | 0.61 |
|                        |          | B-QSAR | 747 | 266 | 94  | 94  | 0.89 | 0.74 | 0.84 | 0.81 | 0.63 |
|                        | MACCS    | RF     | 751 | 197 | 163 | 90  | 0.89 | 0.55 | 0.79 | 0.70 | 0.47 |
|                        |          | SVM    | 782 | 137 | 223 | 59  | 0.93 | 0.38 | 0.77 | 0.59 | 0.38 |
|                        |          | KNN    | 770 | 178 | 182 | 71  | 0.92 | 0.49 | 0.79 | 0.67 | 0.46 |
|                        |          | B-QSAR | 616 | 255 | 105 | 225 | 0.73 | 0.71 | 0.73 | 0.72 | 0.41 |
|                        | SS-FP    | RF     | 795 | 142 | 218 | 46  | 0.95 | 0.39 | 0.78 | 0.61 | 0.43 |
|                        |          | SVM    | 805 | 140 | 220 | 36  | 0.96 | 0.39 | 0.79 | 0.61 | 0.45 |
|                        |          | KNN    | 800 | 130 | 230 | 41  | 0.95 | 0.36 | 0.77 | 0.59 | 0.41 |
|                        |          | B-QSAR | 725 | 191 | 169 | 116 | 0.86 | 0.53 | 0.76 | 0.68 | 0.41 |
|                        | Combined | RF     | 780 | 253 | 107 | 61  | 0.93 | 0.70 | 0.86 | 0.81 | 0.66 |
|                        |          | SVM    | 786 | 216 | 144 | 55  | 0.93 | 0.60 | 0.83 | 0.75 | 0.59 |
|                        |          | KNN    | 744 | 251 | 109 | 97  | 0.88 | 0.70 | 0.83 | 0.79 | 0.59 |
|                        |          | B-QSAR | 727 | 256 | 104 | 114 | 0.86 | 0.71 | 0.82 | 0.78 | 0.57 |

**SI-Table 3:** List of MACCS fingerprints that contributed to the MACCS FP based models and their frequency of occurrences in inhibitor and non-inhibitor

| MACCS key             | Description                                                                  | Inhibitors [%] | Non-Inhibitors [%] |
|-----------------------|------------------------------------------------------------------------------|----------------|--------------------|
| 8 OAA@1               | a 4-membered heterocycle                                                     | 0.19           | 2.82               |
| 17 CTC                | two carbon atoms connected via a triple bond                                 | 0.37           | 1.50               |
| 50 C=C(C)             | propene                                                                      | 93.03          | 74.44              |
| 54 QHAAQH             | two hetero atoms linked via two atoms                                        | 5.48           | 21.24              |
| 69 QQH                | two successive hetero atoms                                                  | 1.12           | 9.77               |
| 75 A!N\$A             | piperidine nitrogen                                                          | 70.17          | 44.55              |
| 76 C=C(A)A            | disubstituted ethene                                                         | 98.51          | 90.60              |
| 84 NH2                | primary amine                                                                | 3.62           | 17.48              |
| 86 CH2QCH2            | hetero atom connected to two aliphatic carbon atoms                          | 72.03          | 40.04              |
| 102 QO                | hetero atom bound to oxygen                                                  | 2.70           | 11.28              |
| 112 AA(A)(A)A         | branched substructure of 5 atoms of any type                                 | 99.63          | 94.36              |
| 125 aromatic ring > 1 | more than one aromatic ring                                                  | 84.85          | 49.44              |
| 129 ACH2AACH2A        | chain of 6 atoms with the second and the fourth being aliphatic carbon atoms | 75.74          | 48.50              |
| 139 OH                | hydroxyl group                                                               | 27.97          | 50.75              |
| 145 6M ring > 1       | more than one 6-membered ring                                                | 92.94          | 70.11              |

|     |          |                                                               |       |       |
|-----|----------|---------------------------------------------------------------|-------|-------|
| 155 | A!CH2!A  | an aliphatic carbon atom connected with two atoms of any type | 94.70 | 79.70 |
| 162 | AROMATIC | at least one aromatic ring                                    | 94.70 | 81.58 |

**SI-Table 4:** List of substructure fingerprints that contributed to the substructure FP based models and their frequency of occurrences in inhibitor and non-inhibitor

| Substructure Fingerprint | Description            | Inhibitor [%] | Non-Inhibitor [%] |
|--------------------------|------------------------|---------------|-------------------|
| SubFP2                   | secondary carbon       | 78.53         | 55.26             |
| SubFP6                   | alkine                 | 0.37          | 1.50              |
| SubFP18                  | alkylarylether         | 48.42         | 24.44             |
| SubFP23                  | amine                  | 60.59         | 32.33             |
| SubFP41                  | 1,2-diol               | 0.56          | 5.83              |
| SubFP84                  | carboxylic acid        | 0.93          | 13.91             |
| SubFP90                  | carbothioic S ester    | 0.09          | 0.38              |
| SubFP128                 | peptide C term         | 0.09          | 3.01              |
| SubFP151                 | guanidine              | 0.09          | 1.88              |
| SubFP169                 | phenol                 | 6.13          | 15.23             |
| SubFP170                 | 1,2-diphenol           | 0.19          | 3.01              |
| SubFP172                 | arylfluoride           | 7.53          | 2.26              |
| SubFP214                 | sulfonic derivative    | 1.21          | 6.77              |
| SubFP274                 | aromatic               | 94.70         | 81.58             |
| SubFP287                 | conjugated double bond | 96.84         | 87.41             |
| SubFP302                 | rotatable bond         | 98.88         | 91.54             |



**SI-Table 5:** Classification performance of models based on physicochemical properties, performed on the Dolghih et al. Dataset

| Model | TP | TN  | FP | FN | Sensitivity | Specificity | Accuracy | G-Mean | MCC  |
|-------|----|-----|----|----|-------------|-------------|----------|--------|------|
| logP  | 8  | 101 | 10 | 16 | 0.33        | 0.91        | 0.81     | 0.55   | 0.27 |
| MW    | 23 | 86  | 25 | 1  | 0.96        | 0.77        | 0.81     | 0.86   | 0.59 |
| logS  | 10 | 99  | 12 | 14 | 0.42        | 0.89        | 0.81     | 0.61   | 0.32 |
| MR    | 18 | 100 | 11 | 6  | 0.75        | 0.90        | 0.87     | 0.82   | 0.61 |

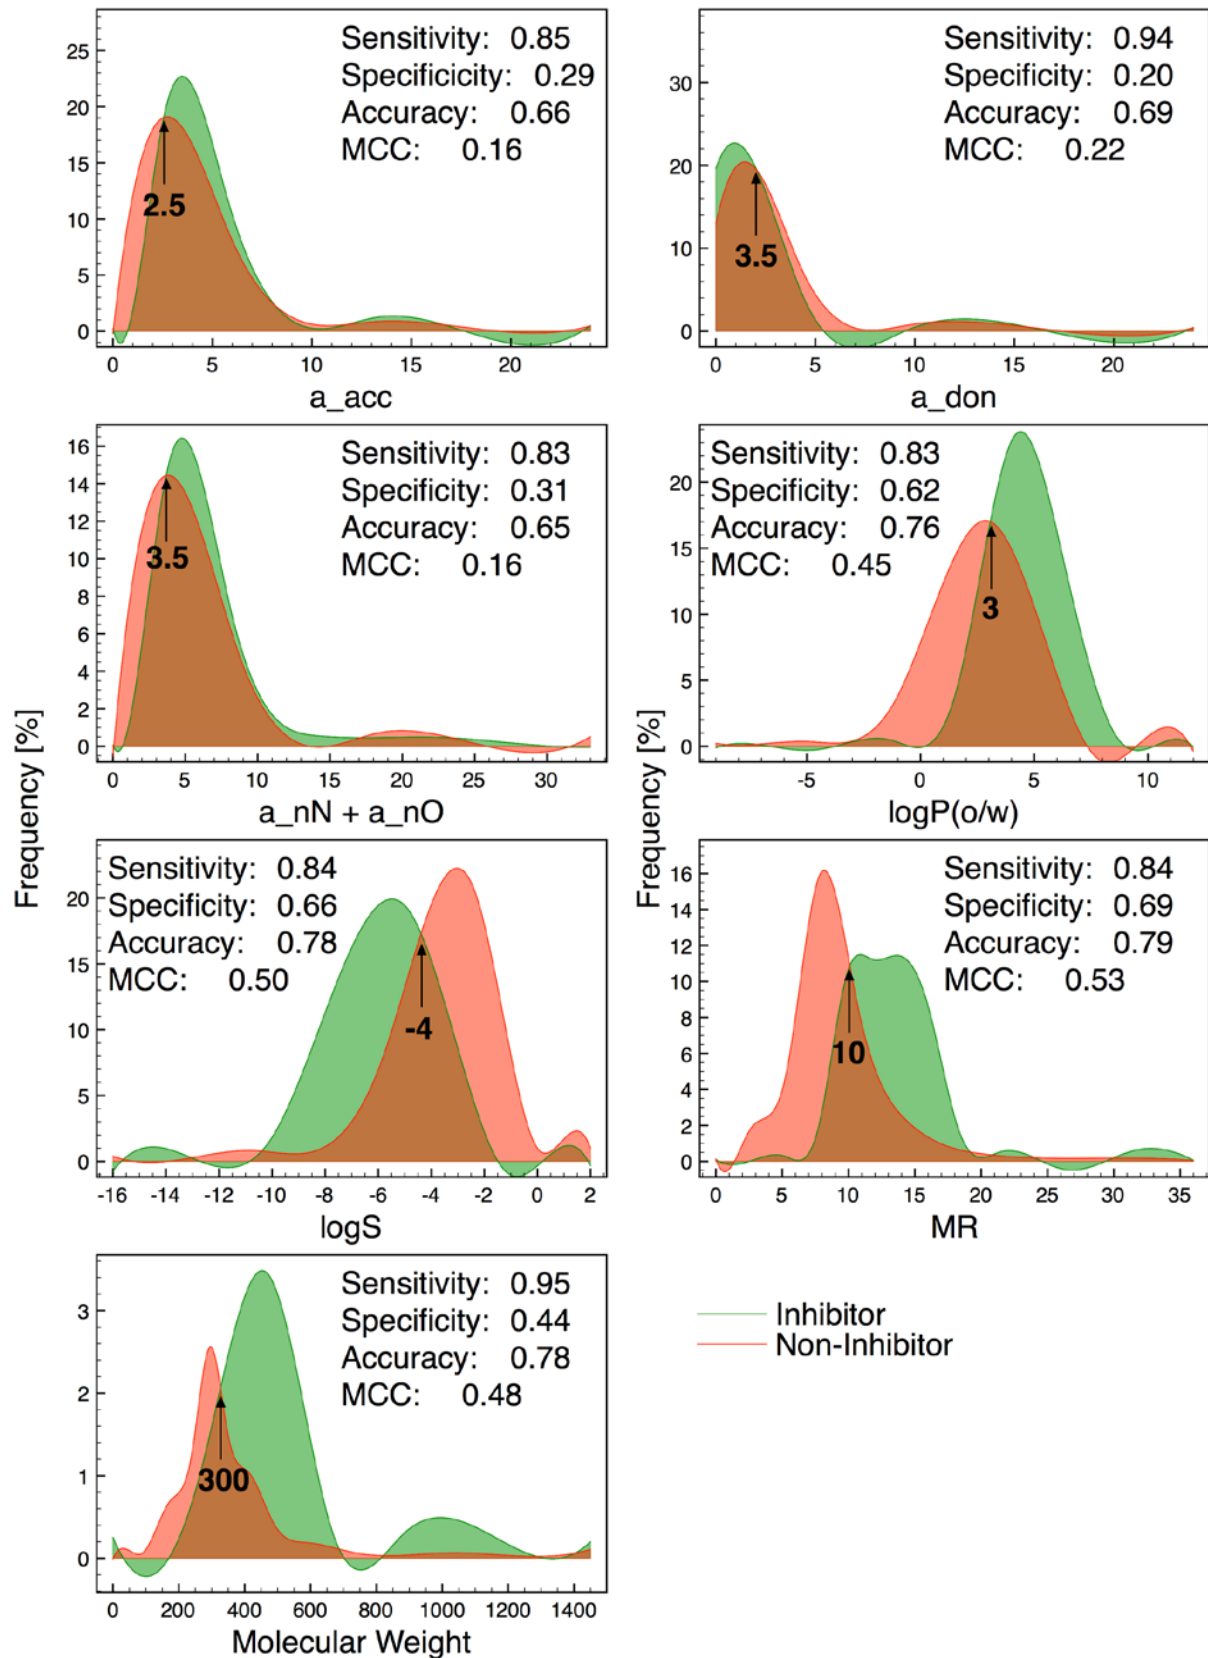

SI-Figure 1: Distribution plots from physicochemical properties

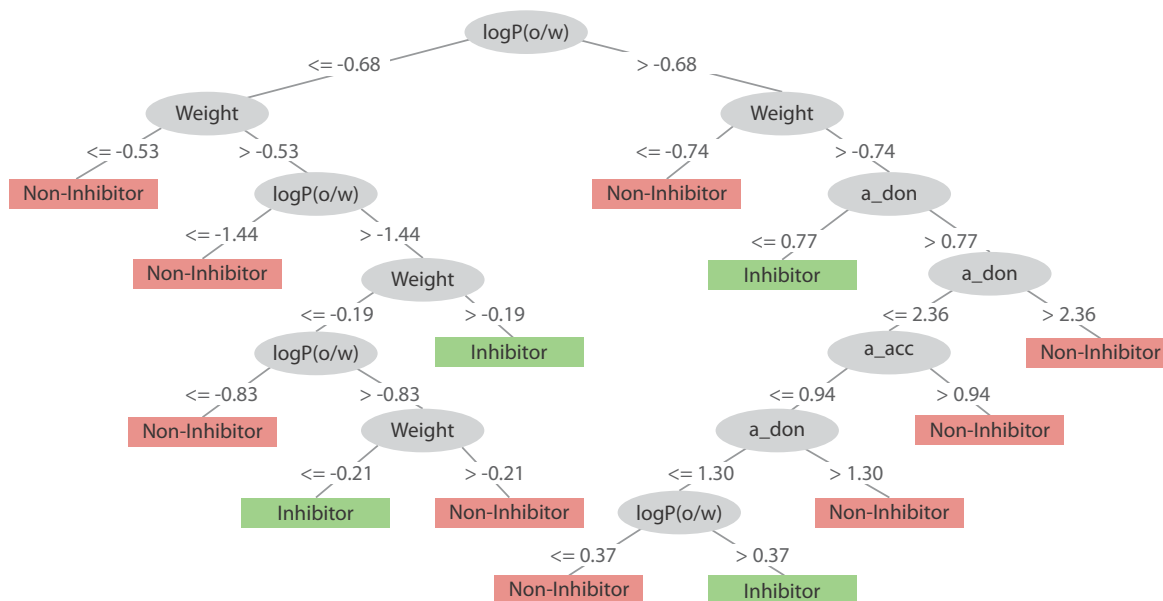

**SI-Figure 2:** Decision tree generated by using “Rule-of-Five” descriptors.

Note: Inhibitor denoted as 1 and non-inhibitor denoted as 0.

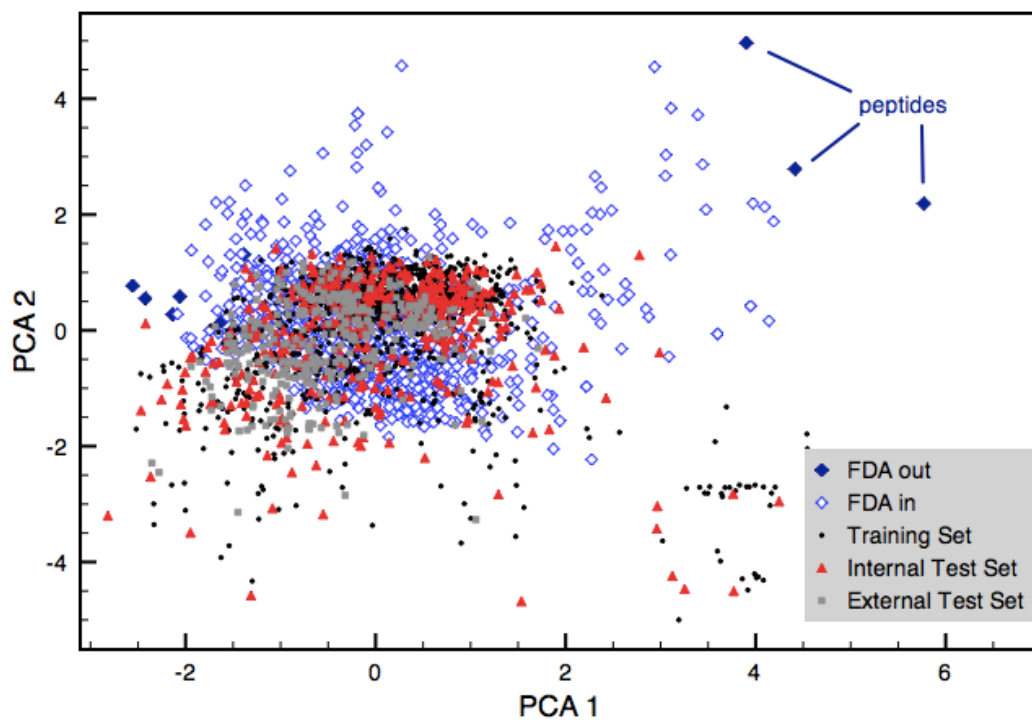

**SI-Figure 3:** Applicability domain experiment using “ED approach” Compounds shown as follows: Training compounds: Gray dots, FDA compounds: red square, Test compounds: Black cross.
